# Supplementary material
Source: publisher figshare collection journal article supplement (https://acs.figshare.com/ndownloader/files/12155399)
Supplement: Supplementary file 1 [file 12155399]

## Supporting Information

# Self-Passivation of $\text{LiNiO}_2$ Cathode for Lithium-Ion Battery through Zr Doping

*Chong S. Yoon,<sup>†</sup> Un-Hyuck Kim,<sup>‡</sup> Geon-Tae Park,<sup>‡</sup> Suk Jun Kim,<sup>||</sup> Kwang-Ho Kim,<sup>§</sup> Jaekook Kim,<sup>⊥</sup>  
and Yang-Kook Sun<sup>\*‡</sup>*

<sup>†</sup>Department of Materials Science and Engineering, Hanyang University, Seoul 04763, South Korea

<sup>‡</sup>Department of Energy Engineering, Hanyang University, Seoul 04763, South Korea

<sup>||</sup> School of Energy, Materials, and Chemical Engineering, Korea University of Technology and Education (KOREATECH), Cheonan 31253, South Korea

<sup>§</sup>School of Materials Science and Engineering, Pusan National University, Busan 46241, South Korea

<sup>⊥</sup>Department of Materials Science and Engineering, Chonnam National University, Gwangju 61186, South Korea

### Corresponding Author

E-mail: [yksun@hanyang.ac.kr](mailto:yksun@hanyang.ac.kr) (Y.-K. Sun)

## EXPERIMENTAL METHODS

**Material synthesis:** A spherical Zr-doped Ni(OH)<sub>2</sub> precursor was synthesized by co-precipitation of aqueous NiSO<sub>4</sub>·6H<sub>2</sub>O and Zr(SO<sub>4</sub>)<sub>2</sub>·4H<sub>2</sub>O solutions (molar ratio of Ni:Zr of 98.6:1.4). The mixed solution was continuously pumped into a batch reactor (47 L) filled with deionized water, NaOH(aq), and NH<sub>4</sub>OH(aq) under a nitrogen atmosphere with vigorous stirring. Concurrently, a 4.0-mol·L<sup>-1</sup> NaOH solution (aq) and NH<sub>4</sub>OH chelating-agent solution (aq) were pumped separately into the reactor.<sup>1</sup> Zr-doped Ni(OH)<sub>2</sub> precursor powder was obtained through filtration, washing, and vacuum drying at 110 °C for 12 h. The precursor powder was mixed with LiOH·H<sub>2</sub>O (Li:Ni = 1.01:1) and calcined at 650 °C for 10 h under a high-purity oxygen atmosphere.

**Analytical techniques:** The chemical compositions of the prepared powders were determined by inductively coupled plasma (ICP-OES, OPIMA 8300, Perkin Elmer). The crystalline phase was analyzed by powder and electrode XRD (Empyrean, Panalytical) using Cu K<sub>α</sub> radiation. XRD data were obtained in a 2θ range of 10° to 110° at a speed of 0.02°·min<sup>-1</sup>. The structural refinement was performed by a Rietveld analysis using the Fullprof suite.<sup>2</sup> The morphologies and structures of the prepared particles were observed by TEM (JEOL 2010, JEOL). The TEM samples were prepared by focused ion-beam milling (FIB, NOVA 200/ FEI).

**Electrochemical Testing:** For the fabrication of positive electrodes and 2032-coin-type half-cell testing, the synthesized powders were mixed with carbon black (super-P:KS-6 = 4:6 wt%) and polyvinylidene fluoride (PVDF, Solef 5130) (90:5.5:4.5 wt%) in *N*-methylpyrrolidinone. The obtained slurry was coated on an Al foil, roll-pressed, and vacuum-dried. The electrolyte solution was 1.2 M LiPF<sub>6</sub> in ethylene-carbonate–ethyl-methyl-carbonate (EC:EMC = 3:7 (vol.%)) with 2 wt% vinylene carbonate (VC) (PanaX Etec, Korea). Preliminary cell tests were performed with a 2032-coin-type half-cell using lithium metal as the anode. The cells were charged and discharged by applying a constant current

density of  $90 \text{ mA} \cdot \text{g}^{-1}$  (0.5 C-rate) at  $30 \text{ }^{\circ}\text{C}$  between  $2.7 \text{ V}$  and  $4.3 \text{ V}$  versus  $\text{Li}^{+}/\text{Li}$ . An electrochemical impedance spectroscopy analysis was performed after charging to  $4.3 \text{ V}$  versus  $\text{Li}^{+}/\text{Li}$  as a function of the number of cycles with a multi-channel potentiostat (Bio-Logic, VMP3) from  $1 \text{ MHz}$  to  $1 \text{ mHz}$ .

Thermal analysis: For a DSC analysis, the 2032-coin-type cells were fully charged to  $4.3 \text{ V}$  and opened in an Ar-filled glove box. Once the remaining electrolyte was removed using dimethyl carbonate, the washed cathode material was scraped from the current collector. A stainless-steel sealed pan with a gold-plated copper seal was used to contain  $7.0 \text{ mg}$  of the sample with the electrolyte. Measurements were performed using a DSC 200 PC (NETZSCH) at a temperature scan rate of  $5 \text{ }^{\circ}\text{C} \cdot \text{min}^{-1}$ .

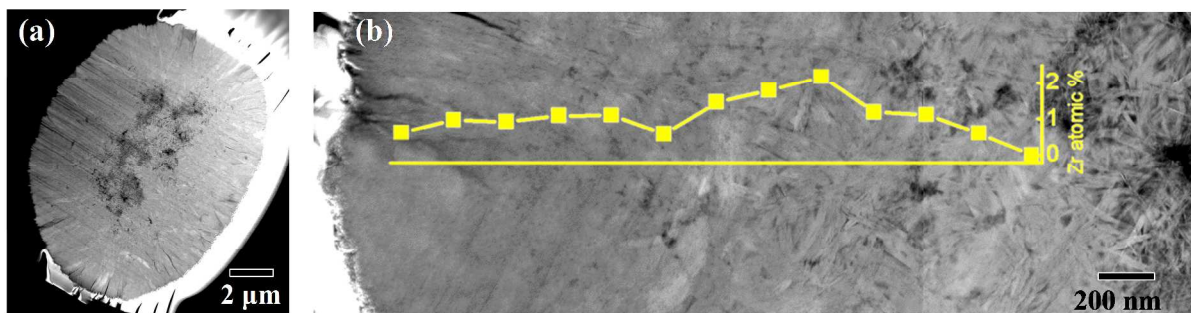

**Figure S1.** (a) Cross-sectional scanning transmission electron microscopy (STEM) dark-field image of the Zr-doped Ni(OH)<sub>2</sub> and (b) mosaic image of a conventional bright-field TEM image with an energy dispersive x-ray spectroscopy (EDS) profile of Zr along the radial direction of the particle.

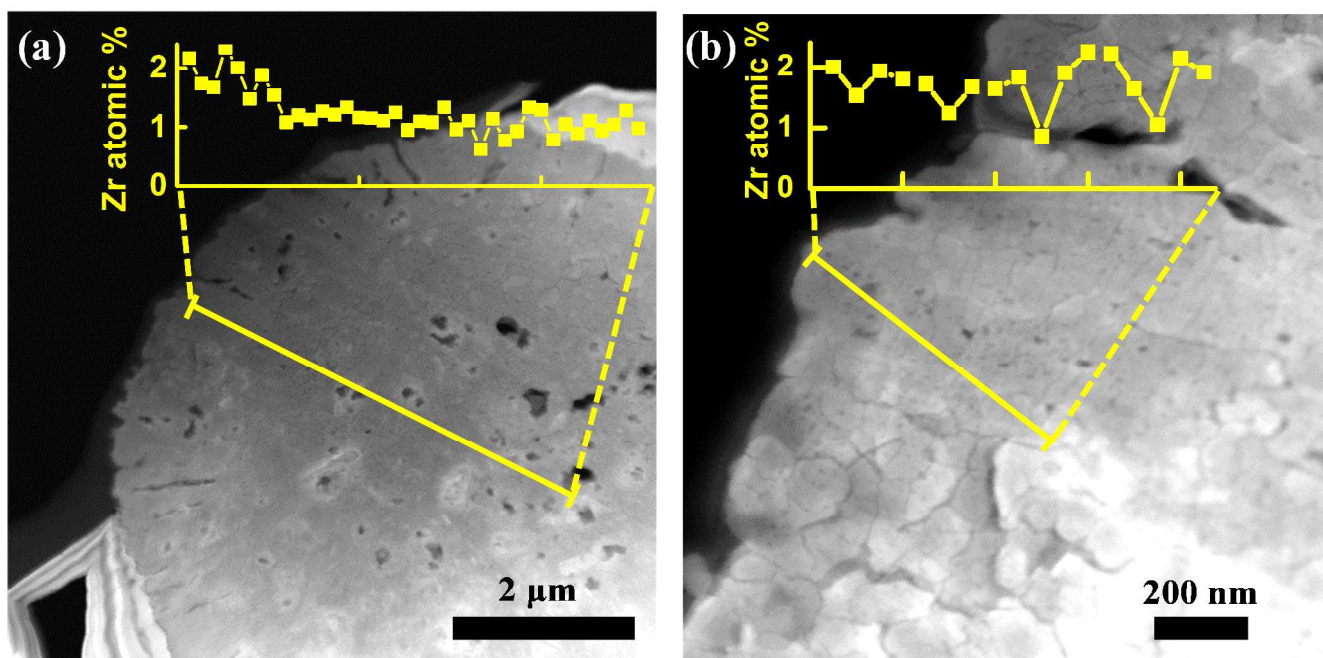

**Figure S2.** (a) Cross-sectional scanning transmission electron microscopy (STEM) dark field image of the Zr doped LiNiO<sub>2</sub> with an EDS profile of Zr along the radial direction of the particle. and (b) surface morphology and an EDS profile of Zr along the radial direction of the local particle surface.

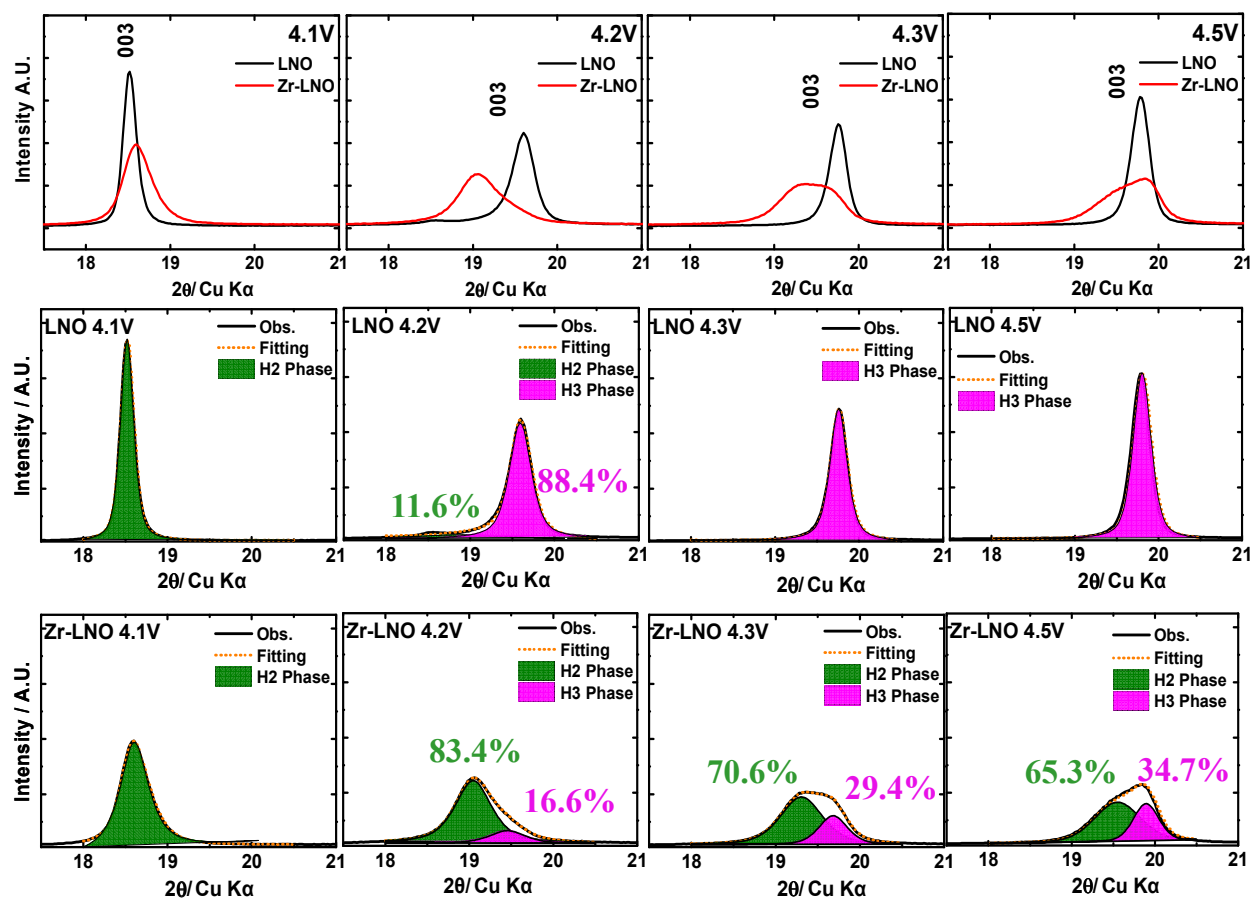

**Figure S3.** (003) X-ray diffraction (XRD) reflections of the LNO and Zr-LNO cathodes showing the coexistence of the H2 and H3 phases at different charge states (4.1 V, 4.2 V, 4.3 V, and 4.5 V.)

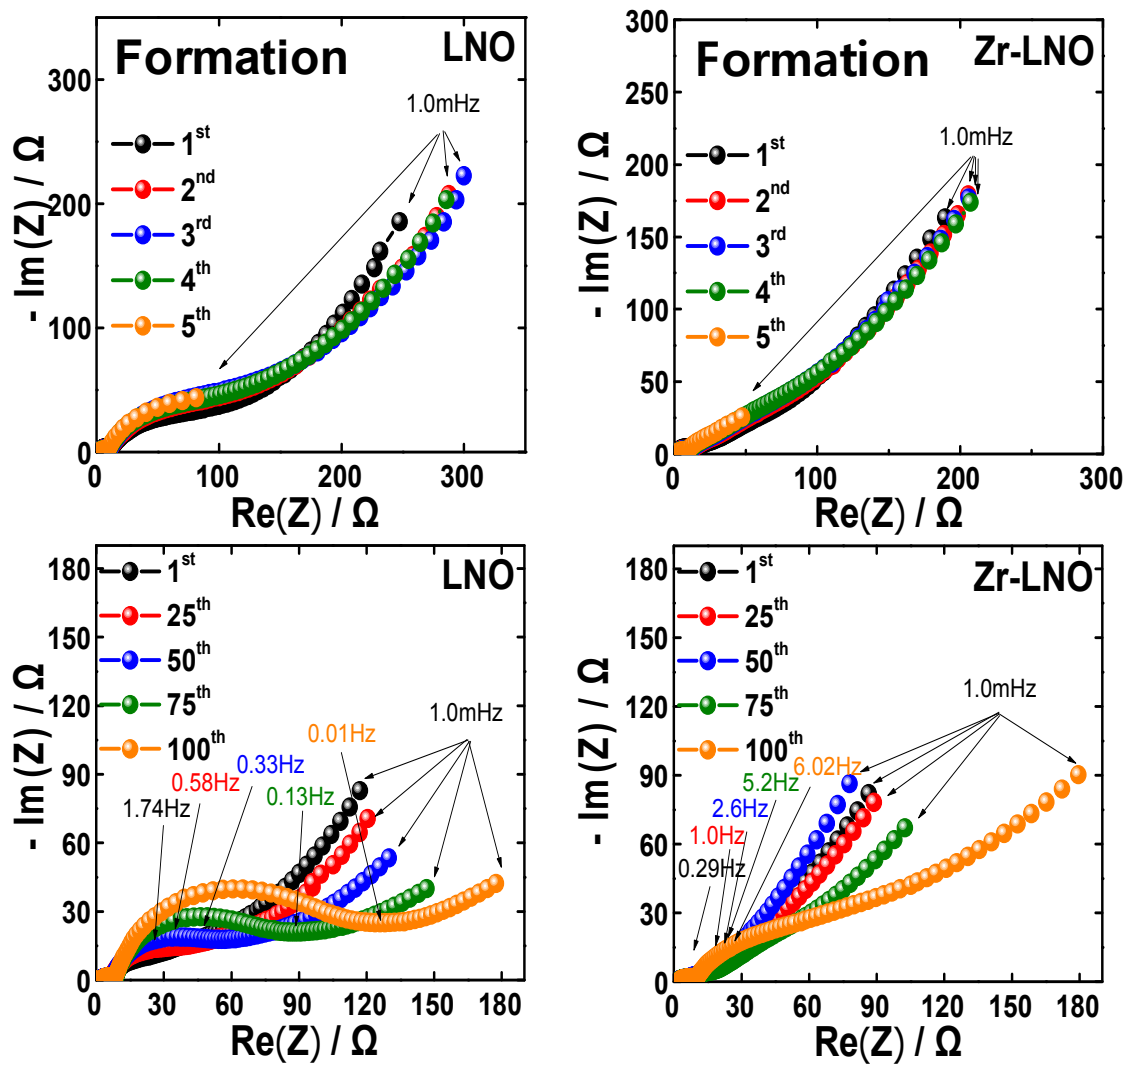

**Figure S4.** Electrochemical impedance spectroscopy plots of the LNO and Zr-LNO cathodes as a function of the cycle number at the charged state (4.3 V vs.  $\text{Li}/\text{Li}^+$ ) at 30 °C.

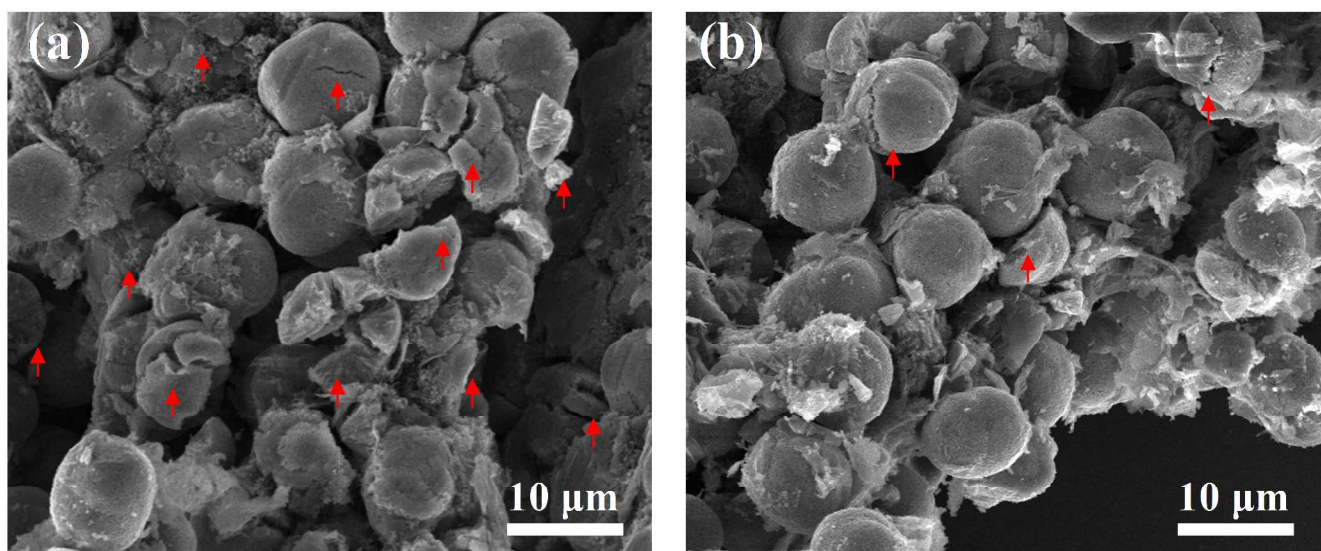

**Figure S5.** SEM images of the cycled (a) LNO and (b) Zr-LNO cathode after 100 cycles (2.7 - 4.3 V). The SEM image of LNO was cited from Ref. 3, Copyright 2017, The American Chemical Society.



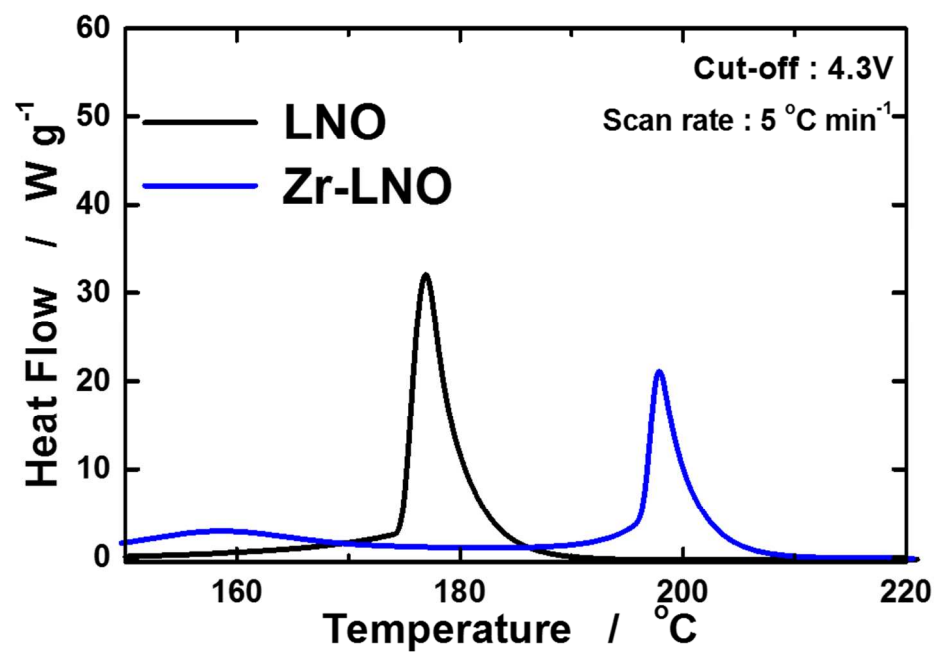

**Figure S6.** Differential scanning calorimetry (DSC) profiles for the LNO and Zr-LNO cathodes.

**Table S1.** Lattice parameters of Zr-LNO and LNO obtained from a series of XRD profiles as a function of the first charge state (4.1 V, 4.2 V, 4.3 V, and 4.5 V) in Figure 2c.

| Voltage /V | LNO               |                   |                          | Zr-LNO            |                   |                          |
|------------|-------------------|-------------------|--------------------------|-------------------|-------------------|--------------------------|
|            | <i>a</i> -axis /Å | <i>c</i> -axis /Å | <i>V</i> /Å <sup>3</sup> | <i>a</i> -axis /Å | <i>c</i> -axis /Å | <i>V</i> /Å <sup>3</sup> |
| <b>4.1</b> | 2.8188(2)         | 14.3761(1)        | 98.925(1)                | 2.8267(9)         | 14.2978(7)        | 98.944(1)                |
| <b>4.2</b> | 2.8167(1)         | 14.3061(1)        | 98.296(1)                | 2.8219(1)         | 13.9440(2)        | 96.162(1)                |
|            | 2.8143(7)         | 13.5857(1)        | 93.192(2)                | 2.8213(8)         | 13.6291(8)        | 93.956(2)                |
| <b>4.3</b> | 2.8149(4)         | 13.5943(2)        | 93.288(1)                | 2.8180(6)         | 13.8323(6)        | 95.132(2)                |
|            |                   |                   |                          | 2.8178(4)         | 13.5688(5)        | 93.305(2)                |
| <b>4.5</b> | 2.8138(2)         | 13.4634(7)        | 92.316(3)                | 2.8169(8)         | 13.6672(3)        | 93.925(1)                |
|            |                   |                   |                          | 2.8151(1)         | 13.4294(3)        | 92.167(4)                |

**Table S2.** Broad comparison of NCM and NCA layered cathodes. The table illustrates that the proposed Zr-doped LNO layered cathodes clearly outperformed other NCM and NCA layered cathodes reported in the literature.

| Num. | Conventional cathode Composition | Voltage Window | Electrolytes                                          | Rate for specific capacity | Cycling rate   | Mass loading of AM (mg/cm <sup>2</sup> ) | Electrode composite Wt% (AM : Conductor : Binder) | Reference |                |           |
|------|----------------------------------|----------------|-------------------------------------------------------|----------------------------|----------------|------------------------------------------|---------------------------------------------------|-----------|----------------|-----------|
| 1    | NCM 333                          | 3.0-4.3V       | 1M LiPF <sub>6</sub> in EC:DEC (1:1 vol%)             | 0.1C (20mA/g)              | 0.5C (100mA/g) | -                                        | 85 : 7.5 : 7.5                                    | 4         |                |           |
| 2    | NCM 523                          |                |                                                       |                            |                |                                          |                                                   |           |                |           |
| 3    | NCM 622                          |                |                                                       |                            |                |                                          |                                                   |           |                |           |
| 4    | NCM 701515                       |                |                                                       |                            |                |                                          |                                                   |           |                |           |
| 5    | NCM 811                          |                |                                                       |                            |                |                                          |                                                   |           |                |           |
| 6    | NCM 900505                       | 2.7-4.3V       | 1.2M LiPF <sub>6</sub> in EC:EMC (3:7 vol%) + VC 2wt% |                            |                | 0.1C (20mA/g)                            | 0.5C (100mA/g)                                    | 5         | 85 : 10 : 5    | 6         |
| 7    | NCM 952.52.5                     |                |                                                       |                            |                |                                          |                                                   |           |                |           |
| 8    | LNO                              |                |                                                       |                            |                |                                          |                                                   |           |                |           |
| 9    | NCA 801505                       |                |                                                       |                            |                |                                          |                                                   |           |                |           |
| 10   | NCA 821404                       |                |                                                       |                            |                |                                          |                                                   |           |                |           |
| 11   | NCA 851104                       |                |                                                       |                            |                |                                          |                                                   |           |                |           |
| 12   | Zr-LNO                           |                |                                                       |                            |                |                                          |                                                   | 4.5-5     | 90 : 5.5 : 4.5 | This work |

All electrochemical evaluations were tested at room temperature.

**EC=Ethylene carbonate**

**DEC= Diethyl carbonate**

**EMC= Ethyl methyl carbonate**

**DMC= Dimethyl carbonate**

**VC= Vinylene carbonate**

## Reference

(1) Lee, M.-H.; Kang, Y.-J.; Myung, S.-T.; Sun, Y.-K. Synthetic optimization of Li[Ni<sub>1/3</sub>Co<sub>1/3</sub>Mn<sub>1/3</sub>]O<sub>2</sub> via co-precipitation. *Electrochim. Acta* **2004**, *50*, 939-948.

(2) Roisnel, T.; Rodriguez-Carvajal, J. *Fullprof Manual*, Institut Laue-Langevin, Grenoble, France **2001**.

- (3) Yoon, C. S.; Jun, D.-W.; Myung, S.-T.; Sun, Y.-K. Structural Stability of LiNiO<sub>2</sub> Cycled above 4.2 V. *ACS Energy Lett.* **2017**, 2, 1150-1155.
- (4) Noh, H.-J.; Youn, S.; Yoon, C. S.; Sun, Y.-K. Comparison of the structural and electrochemical properties of layered Li[Ni<sub>x</sub>Co<sub>y</sub>Mn<sub>z</sub>]O<sub>2</sub> (x=1/3, 0.5, 0.6, 0.7, 0.8 and 0.85) cathode material for lithium-ion batteries. *J. Power Sources.* **2013**, 233, 121-130.
- (5) Yoon, C. S.; Choi, M. H.; Lim, B.-B.; Lee, E.-J.; Sun, Y.-K. Review-High-Capacity Li[Ni<sub>1-x</sub>Co<sub>x/2</sub>Mn<sub>x/2</sub>]O<sub>2</sub> (x=0.1, 0.05, 0) Cathodes for Next-Generation Li-Ion Battery. *J. Electrochem. Soc.* **2015**, 162, A2483-A2489.
- (6) Yoon, C. S.; Park, K.-J.; Kim, U.-H.; Kang, K. H.; Ryu, H.-H.; Sun, Y.-K. High-Energy Ni-Rich Li[Ni<sub>x</sub>Co<sub>y</sub>Mn<sub>1-x-y</sub>]O<sub>2</sub> Cathodes via Compositional Partitioning for Next-Generation Electric Vehicles. *Chem. Mater.* **2017**, 29, 10436-10445.
